# Supplementary material for: Recording and treatment of premenstrual syndrome in UK general practice: a retrospective cohort study
Source: PubMed Central journal article supplement — BMJ Open. 2016 Mar 18;6(3):e010244. doi: 10.1136/bmjopen-2015-010244 (PMC4800111; doi:10.1136/bmjopen-2015-010244), 2016-03-18
Supplement: bmjopen-2015-010244supp.pdf [file bmjopen-2015-010244supp.pdf]

**Table S1** List of diagnostic codes included in the study.

| Read code | Description                         |
|-----------|-------------------------------------|
| Eu3y200   | [X]*Premenstrual dysphoric disorder |
| K584.00   | Premenstrual tension syndrome       |

\*[X] implies a code cross references to a specific ICD10 code

**Table S2** List of drugs included in the prescription analysis, by drug category.

| BNF code    | Drug name                                | Category       |
|-------------|------------------------------------------|----------------|
| 09.06.02.00 | Pyridoxine 50mg capsule                  | Vitamin B6     |
| 09.06.02.00 | Pyridoxine 10mg tablets                  | Vitamin B6     |
| 09.06.02.00 | Pyridoxine 20mg tablets                  | Vitamin B6     |
| 09.06.02.00 | Pyridoxine 10mg tablets                  | Vitamin B6     |
| 09.06.02.00 | Pyridoxine 100mg tablets                 | Vitamin B6     |
| 09.06.02.00 | Pyridoxine 50mg tablets                  | Vitamin B6     |
| 09.06.02.00 | Pyridoxine 50mg tablets                  | Vitamin B6     |
| 09.06.02.00 | VITAMIN B 6 100 MG TAB                   | Vitamin B6     |
| 09.06.02.00 | PYRIDOXINE 50 MG INJ                     | Vitamin B6     |
| 09.06.02.00 | Vitamin b compound strong syrup          | Vitamin B6     |
| 09.06.02.00 | Pyridoxine 50mg tablets                  | Vitamin B6     |
| 09.06.02.00 | Pyridoxine 20mg tablets                  | Vitamin B6     |
| 09.06.02.00 | Pyridoxine 50mg tablets                  | Vitamin B6     |
| 09.06.02.00 | Pyridoxine 20mg tablets                  | Vitamin B6     |
| 09.06.02.00 | Pyridoxine 50mg tablets                  | Vitamin B6     |
| 09.06.02.00 | Pyridoxine 10mg tablets                  | Vitamin B6     |
| 09.06.02.00 | PYRIDOXINE 20mg tablets                  | Vitamin B6     |
| 09.06.02.00 | PYRIDOXINE HCL 100mg m/r tabs            | Vitamin B6     |
| 09.06.02.00 | Pyridoxine 50mg tablets                  | Vitamin B6     |
| 09.06.02.00 | Pyridoxine 10mg tablets                  | Vitamin B6     |
| 09.06.02.00 | Pyridoxine 20mg tablets                  | Vitamin B6     |
| 09.06.02.00 | VITAMIN B 6 50 MG TAB                    | Vitamin B6     |
| 09.06.02.00 | Pyridoxine 100mg modified release tablet | Vitamin B6     |
| 09.06.02.00 | Pyridoxine 10mg tablets                  | Vitamin B6     |
| 09.06.02.00 | PYRIDOXINE 50mg tablets                  | Vitamin B6     |
| 06.07.02.00 | Danazol 200mg capsules                   | Danazol        |
| 06.07.02.00 | Danazol 200mg capsules                   | Danazol        |
| 06.07.02.00 | Danazol 200mg capsules                   | Danazol        |
| 06.07.02.00 | Danazol 100mg capsules                   | Danazol        |
| 06.07.02.00 | DANAZOL 100mg capsules                   | Danazol        |
| 06.07.02.00 | DANAZOL 200mg capsules                   | Danazol        |
| 06.07.02.00 | Danazol 100mg capsules                   | Danazol        |
| 06.07.02.00 | Nafarelin 200micrograms/dose nasal spray | Gonadotrophins |
| 06.07.02.00 | NAFARELIN NASAL 2 MG/ML SPR              | Gonadotrophins |
| 06.07.02.00 | NAFARELIN 200mcg nasal spray             | Gonadotrophins |

|             |                                                                                         |                |
|-------------|-----------------------------------------------------------------------------------------|----------------|
| 08.03.04.02 | Leuprorelin 3.75mg Powder for solution for injection                                    | Gonadotrophins |
| 08.03.04.02 | Cyproterone 100mg tablets                                                               | Gonadotrophins |
| 08.03.04.02 | CYPROTERONE ACETATE 100mg tabs                                                          | Gonadotrophins |
| 08.03.04.02 | Leuprorelin 3.75mg powder and solvent for suspension for injection pre-filled syringes  | Gonadotrophins |
| 08.03.04.02 | BUSERELIN 5.5mg/5.5mL inj                                                               | Gonadotrophins |
| 08.03.04.02 | GOSERELIN 3.6mg implant                                                                 | Gonadotrophins |
| 08.03.04.02 | Flutamide 250mg tablets                                                                 | Gonadotrophins |
| 08.03.04.02 | Cyproterone 100mg tablets                                                               | Gonadotrophins |
| 08.03.04.02 | Leuprorelin 3.75mg powder and solvent for suspension for injection vials                | Gonadotrophins |
| 08.03.04.02 | LEUPRORELIN ACETATE 11.25mg inj                                                         | Gonadotrophins |
| 08.03.04.02 | Flutamide 250mg tablets                                                                 | Gonadotrophins |
| 08.03.04.02 | Buserelin 100micrograms/dose nasal spray                                                | Gonadotrophins |
| 08.03.04.02 | Leuprorelin 11.25mg powder and solvent for suspension for injection pre-filled syringes | Gonadotrophins |
| 08.03.04.02 | Cyproterone 50mg tablets                                                                | Gonadotrophins |
| 08.03.04.02 | LEUPRORELIN ACETATE 3.75mg inj                                                          | Gonadotrophins |
| 08.03.04.02 | Flutamide 250mg tablets                                                                 | Gonadotrophins |
| 08.03.04.02 | GOSERELIN 10.8mg implant                                                                | Gonadotrophins |
| 08.03.04.02 | LEUPRORELIN ACET 11.25mg inj                                                            | Gonadotrophins |
| 08.03.04.02 | LEUPRORELIN 3.75mg injection                                                            | Gonadotrophins |
| 08.03.04.02 | FLUTAMIDE 250mg tablets                                                                 | Gonadotrophins |
| 08.03.04.02 | BUSERELIN 100mcg nasal spray                                                            | Gonadotrophins |
| 08.03.04.02 | BICALUTAMIDE 50mg tablets                                                               | Gonadotrophins |
| 08.03.04.02 | Cyproterone 50mg tablets                                                                | Gonadotrophins |
| 08.03.04.02 | BICALUTAMIDE 150mg tablets                                                              | Gonadotrophins |
| 08.03.04.02 | Flutamide 250mg tablets                                                                 | Gonadotrophins |
| 08.03.04.02 | GOSERELIN 3.6mg implant                                                                 | Gonadotrophins |
| 08.03.04.02 | FLUTAMIDE 250mg tablets                                                                 | Gonadotrophins |
| 08.03.04.02 | CYPROTERONE 50mg tablets                                                                | Gonadotrophins |
| 08.03.04.02 | CYPROTERONE 50mg tablets                                                                | Gonadotrophins |
| 08.03.04.02 | CYPROTERONE ACETATE 100mg tabs                                                          | Gonadotrophins |
| 08.03.04.02 | Bicalutamide 50mg tablets                                                               | Gonadotrophins |
| 08.03.04.02 | Bicalutamide 50mg tablets                                                               | Gonadotrophins |
| 08.03.04.02 | Cyproterone 50mg tablets                                                                | Gonadotrophins |
| 08.03.04.02 | GOSERELIN 10.8mg implant                                                                | Gonadotrophins |
| 08.03.04.02 | LEUPRORELIN ACETATE 3.75mg inj                                                          | Gonadotrophins |
| 08.03.04.02 | Leuprorelin 11.25mg Powder for solution for injection                                   | Gonadotrophins |
| 08.03.04.02 | Bicalutamide 150mg tablets                                                              | Gonadotrophins |
| 08.03.04.02 | Goserelin 10.8mg implant pre-filled syringes                                            | Gonadotrophins |
| 08.03.04.02 | Cyproterone 50mg tablets                                                                | Gonadotrophins |
| 08.03.04.02 | Cyproterone 100mg tablets                                                               | Gonadotrophins |
| 08.03.04.02 | Leuprorelin 11.25mg powder and solvent for                                              | Gonadotrophins |

|             |                                                                                                          |                |
|-------------|----------------------------------------------------------------------------------------------------------|----------------|
|             | suspension for injection vials                                                                           |                |
| 08.03.04.02 | Goserelin 3.6mg implant pre-filled syringes                                                              | Gonadotrophins |
| 08.03.04.02 | Cyproterone 50mg tablets                                                                                 | Gonadotrophins |
| 08.03.04.02 | Abiraterone 250mg tablets                                                                                | Gonadotrophins |
| 08.03.04.02 | Buserelin 5.5mg/5.5ml solution for injection vials                                                       | Gonadotrophins |
| 08.03.04.02 | Histrelin 50mg implant with device                                                                       | Gonadotrophins |
| 06.04.02.00 | CYPROTERONE ACETATE 50mg tabs                                                                            | Gonadotrophins |
| 06.07.02.00 | Triptorelin acetate 3.75mg powder and solvent for suspension for injection pre-filled disposable devices | Gonadotrophins |
| 06.07.02.00 | Triptorelin acetate 11.25mg powder and solvent for suspension for injection vials                        | Gonadotrophins |
| 06.07.02.00 | TRIPTORELIN 3.75mg inj syringe                                                                           | Gonadotrophins |
| 06.07.02.00 | TRIPTORELIN 22.5mg inj pdr                                                                               | Gonadotrophins |
| 06.07.02.00 | TRIPTORELIN 11.25mg injection                                                                            | Gonadotrophins |
| 06.07.02.00 | TRIPTORELIN 11.25mg inj powder                                                                           | Gonadotrophins |
| 06.07.02.00 | Triptorelin embonate 11.25mg powder and solvent for suspension for injection vials                       | Gonadotrophins |
| 06.07.02.00 | Buserelin 150micrograms/dose nasal spray                                                                 | Gonadotrophins |
| 06.07.02.00 | Triptorelin acetate 3mg powder and solvent for suspension for injection vials                            | Gonadotrophins |
| 06.07.02.00 | TRIPTORELIN 3mg inj powder                                                                               | Gonadotrophins |
| 06.07.02.00 | Buserelin 150micrograms spray                                                                            | Gonadotrophins |
| 06.07.02.00 | Triptorelin embonate 22.5mg powder and solvent for suspension for injection vials                        | Gonadotrophins |
| 06.07.02.00 | BUSERELIN 5.5mg/5.5mL inj                                                                                | Gonadotrophins |
| 06.04.01.01 | Estradiol acetate 1.25mg vaginal ring                                                                    | Oestrogen      |
| 06.04.01.01 | ESTRADIOL 0.5mg/dose gel                                                                                 | Oestrogen      |
| 06.04.01.01 | Estradiol 25mg implant                                                                                   | Oestrogen      |
| 06.04.01.01 | ESTRADIOL 80mcg patches                                                                                  | Oestrogen      |
| 06.04.01.01 | CONJUGATED OESTROGENS 625/NORGESTREL 500 MCG TAB                                                         | Oestrogen      |
| 06.04.01.01 | PIPERAZINE ESTRONE 1.5mg tabs                                                                            | Oestrogen      |
| 06.04.01.01 | ESTRADIOL 100mcg patches                                                                                 | Oestrogen      |
| 06.04.01.01 | ESTRADIOL 50micrograms patches                                                                           | Oestrogen      |
| 06.04.01.01 | Ethinylestradiol 10microgram tablets                                                                     | Oestrogen      |
| 06.04.01.01 | Estradiol and (estradiol with levonorgestrel) 50mcg/24hrs with (50mcg+10mcg/24hrs) once weekly patch     | Oestrogen      |
| 06.04.01.01 | Estradiol 25micrograms/24hr twice weekly patch                                                           | Oestrogen      |
| 06.04.01.01 | ESTRADIOL 75micrograms patches                                                                           | Oestrogen      |
| 06.04.01.01 | Estradiol 100micrograms/24hr twice weekly patch                                                          | Oestrogen      |
| 06.04.01.01 | Estradiol with estrone and estriol tablets                                                               | Oestrogen      |
| 06.04.01.01 | ESTRADIOL 75micrograms patches                                                                           | Oestrogen      |
| 06.04.01.01 | ESTRADIOL VALERATE 1mg tablets                                                                           | Oestrogen      |
| 06.04.01.01 | OESTRADIOL 1 MG TAB                                                                                      | Oestrogen      |

|             |                                                                                                           |           |
|-------------|-----------------------------------------------------------------------------------------------------------|-----------|
| 06.04.01.01 | Estradiol 75micrograms/24hr twice weekly patch                                                            | Oestrogen |
| 06.04.01.01 | Estradiol 100micrograms/24hours transdermal patches                                                       | Oestrogen |
| 06.04.01.01 | Estradiol 100micrograms/24hr once weekly patch                                                            | Oestrogen |
| 06.04.01.01 | Estradiol 25micrograms/24hours transdermal patches                                                        | Oestrogen |
| 06.04.01.01 | Estradiol 100mg implant                                                                                   | Oestrogen |
| 06.04.01.01 | Estradiol 100micrograms/24hours transdermal patches                                                       | Oestrogen |
| 06.04.01.01 | Estradiol 100micrograms/24hours transdermal patches                                                       | Oestrogen |
| 06.04.01.01 | ESTRADIOL 100mcg patches                                                                                  | Oestrogen |
| 06.04.01.01 | Estradiol 25micrograms/24hr twice weekly patch                                                            | Oestrogen |
| 06.04.01.01 | ESTRADIOL 100mcg patches                                                                                  | Oestrogen |
| 06.04.01.01 | ESTRADIOL 50micrograms patches                                                                            | Oestrogen |
| 06.04.01.01 | ESTRADIOL VALERATE 2mg tablets                                                                            | Oestrogen |
| 06.04.01.01 | ESTRIOL 250mcg tablets                                                                                    | Oestrogen |
| 06.04.01.01 | ESTRADIOL 1mg/dose gel                                                                                    | Oestrogen |
| 06.04.01.01 | Ethinylestradiol with methyltestosterone 4.4micrograms + 3.6mg Tablet                                     | Oestrogen |
| 06.04.01.01 | OESTRADIOL SKIN PATCHES 50MCG                                                                             | Oestrogen |
| 06.04.01.01 | Estradiol 50micrograms/24hr once weekly patch                                                             | Oestrogen |
| 06.04.01.01 | TRANSDERMAL OESTRADIOL 50 MCG                                                                             | Oestrogen |
| 06.04.01.01 | ESTRADIOL 100mcg patches                                                                                  | Oestrogen |
| 06.04.01.01 | Estradiol 100micrograms/24hr once weekly patch                                                            | Oestrogen |
| 06.04.01.01 | Ethinylestradiol 50microgram tablets                                                                      | Oestrogen |
| 06.04.01.01 | ESTRADIOL 75micrograms patches                                                                            | Oestrogen |
| 06.04.01.01 | ETHINYLOESTRADIOL 30 MCG TAB                                                                              | Oestrogen |
| 06.04.01.01 | Estradiol 50micrograms/24hr twice weekly patch                                                            | Oestrogen |
| 06.04.01.01 | Estradiol 25micrograms/24hours transdermal patches                                                        | Oestrogen |
| 06.04.01.01 | Dienestrol 5mg tablets                                                                                    | Oestrogen |
| 06.04.01.01 | Estradiol valerate and (estradiol valerate with levonorgestrel) 1mg with (1mg with 250micrograms) tablets | Oestrogen |
| 06.04.01.01 | Estradiol 75micrograms/24hr twice weekly patch                                                            | Oestrogen |
| 06.04.01.01 | Estradiol 75micrograms/24hr twice weekly patch                                                            | Oestrogen |
| 06.04.01.01 | ESTRADIOL VALERATE 1mg tablets                                                                            | Oestrogen |
| 06.04.01.01 | ESTRADIOL 100mcg patches                                                                                  | Oestrogen |
| 06.04.01.01 | Estradiol 100micrograms/24hours transdermal patches                                                       | Oestrogen |
| 06.04.01.01 | Conjugated oestrogens 1.25mg tablets and Norgestrel 150microgram tablets                                  | Oestrogen |
| 06.04.01.01 | Estradiol 25micrograms/24hours transdermal patches                                                        | Oestrogen |
| 06.04.01.01 | Estradiol 50micrograms/24hr twice weekly patch                                                            | Oestrogen |
| 06.04.01.01 | Ethinylestradiol 10microgram tablets                                                                      | Oestrogen |

|             |                                                                                         |           |
|-------------|-----------------------------------------------------------------------------------------|-----------|
| 06.04.01.01 | ESTRADIOL 75micrograms patches                                                          | Oestrogen |
| 06.04.01.01 | Estradiol 50mg implant                                                                  | Oestrogen |
| 06.04.01.01 | Estradiol 50micrograms/24hr twice weekly patch                                          | Oestrogen |
| 06.04.01.01 | Conjugated oestrogens 1.25mg tablets                                                    | Oestrogen |
| 06.04.01.01 | Estradiol 50micrograms/24hours / Levonorgestrel 7micrograms/24hours transdermal patches | Oestrogen |
| 06.04.01.01 | ESTRADIOL VALERATE 2mg tablets                                                          | Oestrogen |
| 06.04.01.01 | Ethinylestradiol 50microgram tablets                                                    | Oestrogen |
| 06.04.01.01 | Generic Estracombi TTS transdermal patches                                              | Oestrogen |
| 06.04.01.01 | ESTRADIOL 40micrograms patches                                                          | Oestrogen |
| 06.04.01.01 | ESTRADIOL VALERATE 2mg tablets                                                          | Oestrogen |
| 06.04.01.01 | Estradiol 37.5micrograms/24hr twice weekly patch                                        | Oestrogen |
| 06.04.01.01 | Estradiol 1mg/ml injection                                                              | Oestrogen |
| 06.04.01.01 | Estradiol 100micrograms/24hr twice weekly patch                                         | Oestrogen |
| 06.04.01.01 | Estradiol 500microgram gel sachets                                                      | Oestrogen |
| 06.04.01.01 | QUINESTRADOL 250mcg tablets                                                             | Oestrogen |
| 06.04.01.01 | ETHINYLOESTRADIOL 25 MCG TAB                                                            | Oestrogen |
| 06.04.01.01 | Dienestrol 1mg tablets                                                                  | Oestrogen |
| 06.04.01.01 | Estradiol 40micrograms/24 hourspatch                                                    | Oestrogen |
| 06.04.01.01 | Estradiol 100micrograms/24hr twice weekly patch                                         | Oestrogen |
| 06.04.01.01 | Estropipate 1.5mg tablets                                                               | Oestrogen |
| 06.04.01.01 | Estradiol 100micrograms/24hr twice weekly patch                                         | Oestrogen |
| 06.04.01.01 | Estradiol valerate 2mg tablets                                                          | Oestrogen |
| 06.04.01.01 | Estradiol 50micrograms/24hours transdermal patches                                      | Oestrogen |
| 06.04.01.01 | Estradiol 1mg tablets                                                                   | Oestrogen |
| 06.04.01.01 | ESTRADIOL VALERATE 1mg tablets                                                          | Oestrogen |
| 06.04.01.01 | Estradiol 25micrograms/24hr twice weekly patch                                          | Oestrogen |
| 06.04.01.01 | ESTRADIOL HEMIHYD 150mcg spra                                                           | Oestrogen |
| 06.04.01.01 | Generic Hormonin tablets                                                                | Oestrogen |
| 06.04.01.01 | CONJ OESTROGENS 2.5mg tablets                                                           | Oestrogen |
| 06.04.01.01 | Estradiol 100micrograms/24hr once weekly patch                                          | Oestrogen |
| 06.04.01.01 | Estradiol 50micrograms/24hours transdermal patches                                      | Oestrogen |
| 06.04.01.01 | ESTRADIOL 50micrograms patches                                                          | Oestrogen |
| 06.04.01.01 | OESTRADIOL 17B                                                                          | Oestrogen |
| 06.04.01.01 | Ethinylestradiol 20micrograms Tablet                                                    | Oestrogen |
| 06.04.01.01 | ESTRADIOL 50micrograms patches                                                          | Oestrogen |
| 06.04.01.01 | Estradiol 25micrograms/24hr once weekly patch                                           | Oestrogen |
| 06.04.01.01 | ETHISTERONE 5 MG TAB                                                                    | Oestrogen |
| 06.04.01.01 | Chlorotrianisene                                                                        | Oestrogen |
| 06.04.01.01 | Estradiol 75micrograms/24hours transdermal patches                                      | Oestrogen |
| 06.04.01.01 | ESTRADIOL 37.5micrograms patch                                                          | Oestrogen |
| 06.04.01.01 | OESTRADIOL 50 MG TAB                                                                    | Oestrogen |

|             |                                                                                               |           |
|-------------|-----------------------------------------------------------------------------------------------|-----------|
| 06.04.01.01 | ESTRADIOL 25micrograms patches                                                                | Oestrogen |
| 06.04.01.01 | Estradiol 50micrograms/24hr once weekly patch                                                 | Oestrogen |
| 06.04.01.01 | Estradiol 80micrograms/24hours transdermal patches                                            | Oestrogen |
| 06.04.01.01 | Estradiol 50micrograms/24hr twice weekly patch                                                | Oestrogen |
| 06.04.01.01 | ESTRADIOL 1mg/dose gel                                                                        | Oestrogen |
| 06.04.01.01 | ESTRADIOL VALERATE 1mg tablets                                                                | Oestrogen |
| 06.04.01.01 | ESTRADIOL 100mcg patches                                                                      | Oestrogen |
| 06.04.01.01 | ESTRADIOL 80mcg patches                                                                       | Oestrogen |
| 06.04.01.01 | ESTRADIOL 50micrograms patches                                                                | Oestrogen |
| 06.04.01.01 | Estradiol 25micrograms/24hours transdermal patches                                            | Oestrogen |
| 06.04.01.01 | Estriol 1mg tablets                                                                           | Oestrogen |
| 06.04.01.01 | ESTRADIOL 25micrograms patches                                                                | Oestrogen |
| 06.04.01.01 | ESTRADIOL 50micrograms patches                                                                | Oestrogen |
| 06.04.01.01 | Ethinylestradiol 2microgram tablets                                                           | Oestrogen |
| 06.04.01.01 | ESTRADIOL VALERATE 1mg tablets                                                                | Oestrogen |
| 06.04.01.01 | ETHINYLOESTRADIOL 100 MCG TAB                                                                 | Oestrogen |
| 06.04.01.01 | Estradiol 1mg gel sachets                                                                     | Oestrogen |
| 06.04.01.01 | ESTRADIOL 40micrograms patches                                                                | Oestrogen |
| 06.04.01.01 | ESTRADIOL VALERATE 2mg tablets                                                                | Oestrogen |
| 06.04.01.01 | Estradiol 50micrograms/24hr once weekly patch                                                 | Oestrogen |
| 06.04.01.01 | ESTRADIOL 50mcg/24hours ring                                                                  | Oestrogen |
| 06.04.01.01 | Conjugated oestrogens 300microgram tablets                                                    | Oestrogen |
| 06.04.01.01 | ESTRADIOL 50micrograms patches                                                                | Oestrogen |
| 06.04.01.01 | ESTRADIOL VALERATE 2mg tablets                                                                | Oestrogen |
| 06.04.01.01 | Conjugated oestrogens 2.5mg tablets                                                           | Oestrogen |
| 06.04.01.01 | ESTRADIOL 75micrograms patches                                                                | Oestrogen |
| 06.04.01.01 | Estradiol 2mg tablets                                                                         | Oestrogen |
| 06.04.01.01 | ESTRADIOL VALERATE 2mg tablets                                                                | Oestrogen |
| 06.04.01.01 | Estradiol 25micrograms/24hr twice weekly patch                                                | Oestrogen |
| 06.04.01.01 | Conjugated oestrogens equine with medroxyprogesterone acetate 625micrograms with 10mg tablets | Oestrogen |
| 06.04.01.01 | OESTRADIOL .01 MG TAB                                                                         | Oestrogen |
| 06.04.01.01 | Ethinylestradiol 1mg tablets                                                                  | Oestrogen |
| 06.04.01.01 | Estradiol 50micrograms/24hr twice weekly patch                                                | Oestrogen |
| 06.04.01.01 | Estradiol valerate 1mg tablets                                                                | Oestrogen |
| 06.04.01.01 | ESTRADIOL 50micrograms patches                                                                | Oestrogen |
| 06.04.01.01 | Conjugated oestrogens 625microgram tablets and Norgestrel 150microgram tablets                | Oestrogen |
| 06.04.01.01 | OESTRADIOL 1.25g/dose gel                                                                     | Oestrogen |
| 06.04.01.01 | ESTRADIOL 25micrograms patches                                                                | Oestrogen |
| 06.04.01.01 | Estradiol 25micrograms/24hr twice weekly patch                                                | Oestrogen |
| 06.04.01.01 | Estradiol 50micrograms/24hours transdermal patches                                            | Oestrogen |

|             |                                                                                                      |           |
|-------------|------------------------------------------------------------------------------------------------------|-----------|
| 06.04.01.01 | ESTRADIOL 37.5micrograms patch                                                                       | Oestrogen |
| 06.04.01.01 | ESTRADIOL 50micrograms patches                                                                       | Oestrogen |
| 06.04.01.01 | ESTRADIOL 75micrograms patches                                                                       | Oestrogen |
| 06.04.01.01 | Estradiol 50micrograms/24hr twice weekly patch                                                       | Oestrogen |
| 06.04.01.01 | CONJUGATED OESTROGENS / NORGESTREL 1.25 MG TAB                                                       | Oestrogen |
| 06.04.01.01 | Estradiol 100micrograms/24hr twice weekly patch                                                      | Oestrogen |
| 06.04.01.01 | Estradiol 50mg implant                                                                               | Oestrogen |
| 06.04.01.01 | Estradiol 25micrograms/24hours transdermal patches                                                   | Oestrogen |
| 06.04.01.01 | ETHINYLOESTRADIOL 2 MCG TAB                                                                          | Oestrogen |
| 06.04.01.01 | Estradio; 5m/ml injection                                                                            | Oestrogen |
| 06.04.01.01 | ESTRADIOL 25micrograms patches                                                                       | Oestrogen |
| 06.04.01.01 | Estradiol 25micrograms/24hr once weekly patch                                                        | Oestrogen |
| 06.04.01.01 | Estradiol 75micrograms/24hr twice weekly patch                                                       | Oestrogen |
| 06.04.01.01 | ETHINYLOESTRADIOL 5 MG TAB                                                                           | Oestrogen |
| 06.04.01.01 | ESTRADIOL VALERATE 2mg tablets                                                                       | Oestrogen |
| 06.04.01.01 | ESTRADIOL VALERATE 1mg tablets                                                                       | Oestrogen |
| 06.04.01.01 | Estradiol 75micrograms/24hours transdermal patches                                                   | Oestrogen |
| 06.04.01.01 | ESTRADIOL 50micrograms patches                                                                       | Oestrogen |
| 06.04.01.01 | Estradiol 75micrograms/24hr once weekly patch                                                        | Oestrogen |
| 06.04.01.01 | PREMARIN 1.25MG/NORGESTREL 0.15MG MG TAB                                                             | Oestrogen |
| 06.04.01.01 | Estradiol and (estradiol with levonorgestrel) 80mcg/24hrs with (50mcg+20mcg/24hr) twice weekly patch | Oestrogen |
| 06.04.01.01 | Estriol 250micrograms tablets                                                                        | Oestrogen |
| 06.04.01.01 | ESTRIOL 1mg tablets                                                                                  | Oestrogen |
| 06.04.01.01 | Estradiol 40micrograms/24hours transdermal patches                                                   | Oestrogen |
| 06.04.01.01 | Estradiol 0.06% gel                                                                                  | Oestrogen |
| 06.04.01.01 | Estradiol with estrone and estriol tablets                                                           | Oestrogen |
| 06.04.01.01 | Estradiol 75micrograms/24hr twice weekly patch                                                       | Oestrogen |
| 06.04.01.01 | Estradiol 37.5micrograms/24hours transdermal patches                                                 | Oestrogen |
| 06.04.01.01 | Estradiol 25micrograms/24hr twice weekly patch                                                       | Oestrogen |
| 06.04.01.01 | ESTRADIOL 50micrograms patches                                                                       | Oestrogen |
| 06.04.01.01 | ESTRADIOL 100mcg patches                                                                             | Oestrogen |
| 06.04.01.01 | ESTRADIOL 25micrograms patches                                                                       | Oestrogen |
| 06.04.01.01 | Estradiol 0.1% gel                                                                                   | Oestrogen |
| 06.04.01.01 | ESTRADIOL 0.06% gel                                                                                  | Oestrogen |
| 06.04.01.01 | PREMPAK 1.25MG MG TAB                                                                                | Oestrogen |
| 06.04.01.01 | ETHINYLOESTRADIOL 5 MCG CAP                                                                          | Oestrogen |
| 06.04.01.01 | Conjugated oestrogens 625microgram tablets                                                           | Oestrogen |
| 06.04.01.01 | Estradiol 1mg / Dydrogesterone 5mg tablets                                                           | Oestrogen |
| 06.04.01.01 | ETHINYLOESTRADIOL 20 MCG PES                                                                         | Oestrogen |

|             |                                                                                                                 |           |
|-------------|-----------------------------------------------------------------------------------------------------------------|-----------|
| 06.04.01.01 | Estradiol 25micrograms/24hours transdermal patches                                                              | Oestrogen |
| 06.04.01.01 | Estradiol 150micrograms/dose nasal spray                                                                        | Oestrogen |
| 06.04.01.01 | CONJ OESTROGENS 1.25mg tablets                                                                                  | Oestrogen |
| 06.04.01.01 | ESTRIOL 250mcg tablets                                                                                          | Oestrogen |
| 06.04.01.01 | CONJ OESTROGENS 300mcg tablets                                                                                  | Oestrogen |
| 06.04.01.01 | ETHINYLOESTRADIOL 15 MCG TAB                                                                                    | Oestrogen |
| 06.04.01.01 | CONJ OESTROGENS 625mcg tablets                                                                                  | Oestrogen |
| 06.04.01.01 | Estradiol with (estradiol with norethisterone acetate) 50mcg/24 hr with (50mcg+250mcg/24 hr) twice weekly patch | Oestrogen |
| 06.04.01.01 | Estradiol valerate 1mg / Medroxyprogesterone 5mg tablets                                                        | Oestrogen |
| 06.04.01.01 | Conjugated oestrogens 625microgram tablets and Norgestrel 150microgram tablets                                  | Oestrogen |
| 06.04.01.01 | Estradiol 50micrograms/24hours / Norethisterone 170micrograms/24hours transdermal patches                       | Oestrogen |
| 06.04.01.01 | Estradiol 50micrograms/24hours / Norethisterone 170micrograms/24hours transdermal patches                       | Oestrogen |
| 06.04.01.01 | Generic Clinorette tablets                                                                                      | Oestrogen |
| 06.04.01.01 | Generic Trisequens tablets                                                                                      | Oestrogen |
| 06.04.01.01 | Estradiol with (estradiol with norethisterone acetate) 1mg with (1mg with 1mg) tablets                          | Oestrogen |
| 06.04.01.01 | Estradiol valerate and (estradiol valerate with levonorgestrel) 2mg with (2mg with 75micrograms) tablets        | Oestrogen |
| 06.04.01.01 | Conjugated oestrogens 300microgram / Medroxyprogesterone 1.5mg modified-release tablets                         | Oestrogen |
| 06.04.01.01 | Estradiol 50micrograms/24hours transdermal patches and Norethisterone acetate 1mg tablets                       | Oestrogen |
| 06.04.01.01 | Estradiol 1mg / Drospirenone 2mg tablets                                                                        | Oestrogen |
| 06.04.01.01 | Estradiol 50micrograms/24hours / Norethisterone 170micrograms/24hours transdermal patches                       | Oestrogen |
| 06.04.01.01 | Generic Climagest 1mg tablets                                                                                   | Oestrogen |
| 06.04.01.01 | ESTRADI+NORETHIS 2/0.7mg tabs                                                                                   | Oestrogen |
| 06.04.01.01 | Estradiol 80micrograms/24hours transdermal patches and Dydrogesterone 10mg tablets                              | Oestrogen |
| 06.04.01.01 | Generic Nuvelle TS transdermal patches                                                                          | Oestrogen |
| 06.04.01.01 | Generic Novofem tablets                                                                                         | Oestrogen |
| 06.04.01.01 | Estradiol valerate 1mg / Medroxyprogesterone 5mg tablets                                                        | Oestrogen |
| 06.04.01.01 | Estradiol 80micrograms/24hours transdermal patches and Dydrogesterone 10mg tablets                              | Oestrogen |
| 06.04.01.01 | ESTRADIOL+NORETHIS 2/1mg tabs                                                                                   | Oestrogen |
| 06.04.01.01 | Generic Climagest 1mg tablets                                                                                   | Oestrogen |
| 06.04.01.01 | Estradiol valerate and (estradiol valerate with norethisterone) 1mg with (1mg with 1mg) tablets                 | Oestrogen |



|             |                                                                                                                          |           |
|-------------|--------------------------------------------------------------------------------------------------------------------------|-----------|
| 06.04.01.01 | Generic Nuvelle tablets                                                                                                  | Oestrogen |
| 06.04.01.01 | Estradiol valerate and (estradiol valerate with medroxyprogesterone acetate) with placebo 2mg with (2mg with 20mg) with  | Oestrogen |
| 06.04.01.01 | Generic Nuvelle tablets                                                                                                  | Oestrogen |
| 06.04.01.01 | Conjugated oestrogens 1.25mg tablets and Norgestrel 150microgram tablets                                                 | Oestrogen |
| 06.04.01.01 | Generic Tridestra tablets                                                                                                | Oestrogen |
| 06.04.01.01 | ESTRADIO+NORETHIS 1/0.5mg tabs                                                                                           | Oestrogen |
| 06.04.01.01 | Generic Evorel Sequi transdermal patches                                                                                 | Oestrogen |
| 06.04.01.01 | Norgestrel and conjugated oestrogens (equine) 150micrograms + 1.25mg Tablet                                              | Oestrogen |
| 06.04.01.01 | Estradiol valerate and (estradiol valerate with norgestrel) 2mg with (2mg with 500micrograms) tablets                    | Oestrogen |
| 06.04.01.01 | Estradiol with norethisterone acetate ( continuous combined) 2mg with 0.7mg tablets                                      | Oestrogen |
| 06.04.01.01 | CONJ OEST 0.625mg/MPA 5mg tabs                                                                                           | Oestrogen |
| 06.04.01.01 | Generic Cyclo-Progynova 2mg tablets                                                                                      | Oestrogen |
| 06.04.01.01 | Conjugated oestrogens 1.25mg tablets and Norgestrel 150microgram tablets                                                 | Oestrogen |
| 06.04.01.01 | Estradiol with (estradiol with norethisterone acetate) 50mcg/24 hr with (50mcg+170mcg/24 hr) twice weekly patch          | Oestrogen |
| 06.04.01.01 | Estradiol and (estradiol with norethisterone) and (estradiol) 2mg with (2mg with 1mg) tablets                            | Oestrogen |
| 06.04.01.01 | ESTRADIOL+NORETHIS 2/1mg tabs                                                                                            | Oestrogen |
| 06.04.01.01 | DROSPIR 2mg/ESTRADIOL 1mg tabs                                                                                           | Oestrogen |
| 06.04.01.01 | Estradiol valerate 2mg / Norethisterone 700microgram tablets                                                             | Oestrogen |
| 06.04.01.01 | Estradiol and (estradiol with dydrogesterone) 2mg with (2mg with 10 mg) tablets                                          | Oestrogen |
| 06.04.01.01 | Estradiol 40micrograms/24hours transdermal patches and Dydrogesterone 10mg tablets                                       | Oestrogen |
| 06.04.01.01 | Estradiol 1mg / Dydrogesterone 5mg tablets                                                                               | Oestrogen |
| 06.04.01.01 | Estradiol and (estradiol with norethisterone) and (estradiol) triphasic forte 4mg with (4mg with 1mg) with (1mg) tablets | Oestrogen |
| 06.04.01.01 | Piperazine oestrone sulphate 1.5mg with medroxyprogesterone 10mg tablet                                                  | Oestrogen |
| 06.04.01.01 | Estradiol and (estradiol with dydrogesterone) 2mg with (2mg with 20mg) tablets                                           | Oestrogen |
| 06.04.01.01 | Generic Femoston 1/10mg tablets                                                                                          | Oestrogen |
| 06.04.01.01 | Estradiol with norethisterone 0mcg/24hours(3.2mg/unit) with 1mg patch with tablet                                        | Oestrogen |
| 06.04.01.01 | Generic FemSeven Sequi transdermal patches                                                                               | Oestrogen |
| 06.04.01.01 | Estradiol 2mg / Norethisterone acetate 1mg tablets                                                                       | Oestrogen |
| 06.04.01.01 | CONJ OEST 0.3mg/MPA 1.5mg tabs                                                                                           | Oestrogen |

|             |                                                                                                                          |           |
|-------------|--------------------------------------------------------------------------------------------------------------------------|-----------|
| 06.04.01.01 | Estradiol 500micrograms / Dydrogesterone 2.5mg tablets                                                                   | Oestrogen |
| 06.04.01.01 | Generic Premique Cycle tablets                                                                                           | Oestrogen |
| 06.04.01.01 | ESTRADIOL+NORETHIS 2/1mg tabs                                                                                            | Oestrogen |
| 06.04.01.01 | Estradiol valerate 1mg / Medroxyprogesterone 2.5mg tablets                                                               | Oestrogen |
| 06.04.01.01 | Estradiol with norethisterone acetate 50mcg/24hours(4mg/unit) with 1mg patch with tablet                                 | Oestrogen |
| 06.04.01.01 | Generic Femoston 2/10mg tablets                                                                                          | Oestrogen |
| 06.04.01.01 | Generic Trisequens Forte tablets                                                                                         | Oestrogen |
| 06.04.01.01 | Estradiol with (estradiol with norethisterone acetate) 50mcg/24 hr with (50mcg+250mcg/24 hr) twice weekly patch          | Oestrogen |
| 06.04.01.01 | Norgestrel and conjugated oestrogens (equine) 150micrograms + 625micrograms Tablet                                       | Oestrogen |
| 06.04.01.01 | Estradiol valerate 1mg / Medroxyprogesterone 2.5mg tablets                                                               | Oestrogen |
| 06.04.01.01 | Generic Adgyn Combi tablets                                                                                              | Oestrogen |
| 06.04.01.01 | Estradiol 1mg / Norethisterone acetate 500microgram tablets                                                              | Oestrogen |
| 06.04.01.01 | Estradiol 50micrograms/24hours / Levonorgestrel 7micrograms/24hours transdermal patches                                  | Oestrogen |
| 06.04.01.01 | Generic Elleste Duet 2mg tablets                                                                                         | Oestrogen |
| 06.04.01.01 | Estradiol valerate and (estradiol valerate with norethisterone) 2mg with (2mg with 1 mg) tablets                         | Oestrogen |
| 06.04.01.01 | Estradiol 50micrograms/24hours transdermal patches and Norethisterone 1mg tablets                                        | Oestrogen |
| 06.04.01.01 | Generic Femoston 2/20mg tablets                                                                                          | Oestrogen |
| 06.04.01.01 | Conjugated oestrogens 625microgram / Medroxyprogesterone 5mg tablets                                                     | Oestrogen |
| 06.04.01.01 | Estradiol 1mg / Dydrogesterone 5mg tablets                                                                               | Oestrogen |
| 06.04.01.01 | Generic Elleste Duet 1mg tablets                                                                                         | Oestrogen |
| 06.04.01.01 | Estradiol 50micrograms/24hours / Levonorgestrel 7micrograms/24hours transdermal patches                                  | Oestrogen |
| 06.04.01.01 | Conjugat oestrogen equi and (conjugat oestrogen equi with medroxyprogesterone acetate 625 micrograms with (625 microgram | Oestrogen |
| 06.04.01.01 | Estradiol valerate 2mg / Medroxyprogesterone 5mg tablets                                                                 | Oestrogen |
| 06.04.01.01 | Estradiol 40micrograms/24hours transdermal patches and Dydrogesterone 10mg tablets                                       | Oestrogen |
| 06.04.01.01 | Generic Cyclo-Progynova 1mg tablets                                                                                      | Oestrogen |
| 06.04.01.01 | PREMARIN 0.625MG/NORGESTREL 0.15MG MG TAB                                                                                | Oestrogen |
| 06.04.01.01 | Estradiol valerate with medroxyprogesterone acetate tablets                                                              | Oestrogen |
| 06.04.01.01 | Mestranol with norethisterone Tablet                                                                                     | Oestrogen |
| 06.04.01.01 | ESTRADIOL+NORETHIS 2/1mg tabs                                                                                            | Oestrogen |

|             |                                                                                                    |                                |
|-------------|----------------------------------------------------------------------------------------------------|--------------------------------|
| 06.04.01.01 | Piperazine oestrone sulphate 1.5mg with medroxyprogesterone 10mg tablet                            | Oestrogen                      |
| 06.04.01.01 | Estradiol with (estradiol with norethisterone acetate) 2mg with (2mg with 1 mg) tablets            | Oestrogen                      |
| 06.04.01.01 | Conjugated oestrogens 625microgram tablets and Norgestrel 150microgram tablets                     | Oestrogen                      |
| 06.04.01.01 | Estradiol and (estradiol with dydrogesterone) 1mg with (1mg with 10mg) tablets                     | Oestrogen                      |
| 06.04.01.01 | Estradiol and (estradiol with norethisterone) 2mg with (2mg with 1mg) tablets                      | Oestrogen                      |
| 06.04.01.01 | ESTRADIOL+NORETHIS 2/1mg tabs                                                                      | Oestrogen                      |
| 06.04.01.01 | Estradiol valerate 2mg / Medroxyprogesterone 5mg tablets                                           | Oestrogen                      |
| 06.04.01.01 | Estradiol and (estradiol with dydrogesterone) tablets 1mg with 5mg                                 | Oestrogen                      |
| 07.03.01.00 | Estradiol valerate and (estradiol valerate with dienogest) tablets                                 | Oestrogen                      |
| 07.03.01.00 | Generic Qlaira tablets                                                                             | Oestrogen                      |
| 06.04.01.01 | ETHINYL+NOREL 600mcg/6mg patch                                                                     | Oestrogen                      |
| 06.04.01.01 | Ethinylestradiol 33.9micrograms/24hours / Norelgestromin 203micrograms/24hours transdermal patches | Oestrogen                      |
| 06.04.01.01 | Norelgestromin with ethinylestradiol 203micrograms + 33.9micrograms/24hours Transdermal patch      | Oestrogen                      |
| 07.03.02.01 | Levonorgestrel 750microgram tablets                                                                | progestogen only contraceptive |
| 07.03.02.01 | DESOGESTREL 75mcg tablets                                                                          | progestogen only contraceptive |
| 07.03.02.01 | DESOGESTREL 75mcg tablets                                                                          | progestogen only contraceptive |
| 07.03.02.01 | Desogestrel 75microgram tablets                                                                    | progestogen only contraceptive |
| 07.03.02.02 | ETONOGESTREL 68mg implant                                                                          | progestogen only contraceptive |
| 07.03.02.02 | Norethisterone 200mg/1ml solution for injection ampoules                                           | progestogen only contraceptive |
| 07.03.02.02 | ETONOGESTREL 68mg implant                                                                          | progestogen only contraceptive |
| 07.03.02.02 | NORETHISTERONE 200mg/1mL inj                                                                       | progestogen only contraceptive |
| 07.03.02.02 | Etonogestrel 68mg implant                                                                          | progestogen only contraceptive |
| 07.03.02.00 | MEDROXYPROGEST 50mg/mL inj                                                                         | progestogen only contraceptive |
| 07.03.02.01 | Norgestrel 75microgram tablets                                                                     | progestogen only contraceptive |
| 07.03.02.01 | LEVONORGESTREL 37.5mcg tabs                                                                        | progestogen only contraceptive |
| 07.03.02.01 | Etynodiol 500microgram tablets                                                                     | progestogen only contraceptive |
| 07.03.02.01 | ETYNODIOL DIACET 500mcg tabs                                                                       | progestogen only contraceptive |
| 07.03.02.02 | MEDROXYPROGEST 150mg/1mL inj                                                                       | progestogen only contraceptive |
| 07.03.02.02 | MEDROXYPROGEST 150mg/1mL inj                                                                       | progestogen only contraceptive |
| 07.03.02.02 | MEDROXYPROGEST 150mg/1mL inj                                                                       | progestogen only contraceptive |
| 07.03.02.02 | MEDROXYPROGEST 150mg/1mL inj                                                                       | progestogen only contraceptive |
| 07.03.02.03 | Levonorgestrel 20micrograms/24hours intrauterine device                                            | progestogen only contraceptive |
| 07.03.02.02 | LEVONORGESTREL 38mg implant                                                                        | progestogen only contraceptive |
| 07.03.02.02 | Levonorgestrel 228mg Implant                                                                       | progestogen only contraceptive |

|             |                                                                            |                                |
|-------------|----------------------------------------------------------------------------|--------------------------------|
| 07.03.02.03 | LEVONORGESTREL 52mg i-u system                                             | progestogen only contraceptive |
| 07.03.02.01 | Norethisterone 350mcg tablet                                               | progestogen only contraceptive |
| 07.03.02.01 | Norethisterone 350microgram tablets                                        | progestogen only contraceptive |
| 07.03.02.01 | Norethisterone 350mcg tablet                                               | progestogen only contraceptive |
| 07.03.02.02 | Medroxyprogesterone 150mg/1ml suspension for injection pre-filled syringes | progestogen only contraceptive |
| 07.03.02.02 | MEDROXYPROGEST 150mg/1mL syrng                                             | progestogen only contraceptive |
| 07.03.01.00 | Ethinylestradiol 2.7mg / Etonogestrel 11.7mg vaginal delivery system       | progestogen only contraceptive |
| 07.03.02.01 | LEVONORGESTREL 30mcg tablets                                               | progestogen only contraceptive |
| 07.03.02.01 | Levonorgestrel 30microgram tablets                                         | progestogen only contraceptive |
| 07.03.02.01 | LEVONORGESTREL 30mcg tablets                                               | progestogen only contraceptive |
| 08.03.02.00 | Medroxyprogesterone acetate contraceptive 150mg/ml Injection               | progestogen only contraceptive |
| 06.04.01.01 | Phyto progesterone 1.5% cream                                              | Progestogen/Progesterone       |
| 06.04.01.01 | Progesterone 1.5% cream                                                    | Progestogen/Progesterone       |
| 06.04.01.01 | Phyto progesterone 3% cream                                                | Progestogen/Progesterone       |
| 06.04.01.01 | Phyto progesterone cream                                                   | Progestogen/Progesterone       |
| 06.04.01.01 | Progesterone 3% cream                                                      | Progestogen/Progesterone       |
| 06.04.01.01 | Phyto progesterone cream                                                   | Progestogen/Progesterone       |
| 06.04.01.02 | HYDROXYPROG HEX 500mg/2mL inj                                              | Progestogen/Progesterone       |
| 06.04.01.02 | PROGESTERONE 100mg capsules                                                | Progestogen/Progesterone       |
| 06.04.01.02 | MEDROXYPROGESTERONE 5mg tabs                                               | Progestogen/Progesterone       |
| 06.04.01.02 | PROGESTERONE 50mg/1mL inj                                                  | Progestogen/Progesterone       |
| 06.04.01.02 | PROGESTERONE 200mg capsules                                                | Progestogen/Progesterone       |
| 06.04.01.02 | NORETHISTERONE 5mg tablets                                                 | Progestogen/Progesterone       |
| 06.04.01.02 | MEDROXYPROGESTERONE 2.5mg tabs                                             | Progestogen/Progesterone       |
| 06.04.01.02 | Medroxyprogesterone 5mg tablets                                            | Progestogen/Progesterone       |
| 06.04.01.02 | Norethisterone 5mg tablets                                                 | Progestogen/Progesterone       |
| 06.04.01.02 | PROGESTERONE 10mg/1mL inj                                                  | Progestogen/Progesterone       |
| 06.04.01.02 | Dydrogesterone 10mg tablets                                                | Progestogen/Progesterone       |
| 06.04.01.02 | Progesterone 50mg/ml injection                                             | Progestogen/Progesterone       |
| 06.04.01.02 | Norethisterone 5mg tablets                                                 | Progestogen/Progesterone       |
| 06.04.01.02 | Norethisterone 5mg tablets                                                 | Progestogen/Progesterone       |
| 06.04.01.02 | Progesterone micronised 200mg capsules                                     | Progestogen/Progesterone       |
| 06.04.01.02 | Hydroxyprogesterone caproate 500mg/2ml Injection                           | Progestogen/Progesterone       |
| 06.04.01.02 | DYDROGESTERONE 10mg tablets                                                | Progestogen/Progesterone       |
| 06.04.01.02 | NORETHISTERONE 1mg tablets                                                 | Progestogen/Progesterone       |
| 06.04.01.02 | MEDROXYPROGESTERONE 5mg tabs                                               | Progestogen/Progesterone       |
| 06.04.01.02 | Norethisterone 5mg tablets                                                 | Progestogen/Progesterone       |
| 06.04.01.02 | Medroxyprogesterone 2.5mg tablets                                          | Progestogen/Progesterone       |
| 06.04.01.02 | MEDROXYPROGESTERONE 5mg tabs                                               | Progestogen/Progesterone       |
| 06.04.01.02 | PROGESTERONE 400mg supps                                                   | Progestogen/Progesterone       |
| 06.04.01.02 | NORETHISTERONE 5mg tablets                                                 | Progestogen/Progesterone       |

|             |                                                               |                          |
|-------------|---------------------------------------------------------------|--------------------------|
| 06.04.01.02 | PROGESTERONE B.P IMPLANT 100 MG                               | Progestogen/Progesterone |
| 06.04.01.02 | Progesterone 200mg pessaries                                  | Progestogen/Progesterone |
| 06.04.01.02 | MEDROXYPROGESTERONE 10mg tabs                                 | Progestogen/Progesterone |
| 06.04.01.02 | Norethisterone 5mg tablets                                    | Progestogen/Progesterone |
| 06.04.01.02 | Progesterone 25mg/1ml solution for injection ampoules         | Progestogen/Progesterone |
| 06.04.01.02 | PROGESTERONE 100 MG INJ                                       | Progestogen/Progesterone |
| 06.04.01.02 | DYDROGESTERONE 10mg tablets                                   | Progestogen/Progesterone |
| 06.04.01.02 | Progesterone micronised 100mg capsules                        | Progestogen/Progesterone |
| 06.04.01.02 | Progesterone 50mg/1ml solution for injection ampoules         | Progestogen/Progesterone |
| 06.04.01.02 | NORETHISTERONE 5mg tablets                                    | Progestogen/Progesterone |
| 06.04.01.02 | GESTONE 25 MG TAB                                             | Progestogen/Progesterone |
| 06.04.01.02 | PROGESTERONE 4% vaginal gel                                   | Progestogen/Progesterone |
| 06.04.01.02 | PROGESTERONE 25mg/1mL inj                                     | Progestogen/Progesterone |
| 06.04.01.02 | Hydroxyprogesterone 250mg/1ml solution for injection ampoules | Progestogen/Progesterone |
| 06.04.01.02 | Medroxyprogesterone 10mg tablets                              | Progestogen/Progesterone |
| 06.04.01.02 | PROGESTERONE 100mg/2mL inj                                    | Progestogen/Progesterone |
| 06.04.01.02 | PROGESTERONE 200mg supps                                      | Progestogen/Progesterone |
| 06.04.01.02 | PROGESTERONE 100mg/2mL inj                                    | Progestogen/Progesterone |
| 06.04.01.02 | PROGESTERONE 400mg supps                                      | Progestogen/Progesterone |
| 06.04.01.02 | PROGESTERONE 400mg supps                                      | Progestogen/Progesterone |
| 06.04.01.02 | PROGESTERONE 100mg/2mL inj                                    | Progestogen/Progesterone |
| 06.04.01.02 | PROGESTERONE 8% vaginal gel                                   | Progestogen/Progesterone |
| 06.04.01.02 | GESTONE 10 MG TAB                                             | Progestogen/Progesterone |
| 06.04.01.02 | Megestrol acetate (roi) 40mg/ml Oral suspension               | Progestogen/Progesterone |
| 06.04.01.02 | Progesterone 100mg/2ml solution for injection ampoules        | Progestogen/Progesterone |
| 06.04.01.02 | ALLYLOESTRENOL 5mg tablets                                    | Progestogen/Progesterone |
| 06.04.01.02 | Progesterone 4% vaginal gel 1.125g applicators                | Progestogen/Progesterone |
| 06.04.01.02 | PROGESTERONE 200mg supps                                      | Progestogen/Progesterone |
| 06.04.01.02 | HYDROXYPROG CAP 250mg/1mL inj                                 | Progestogen/Progesterone |
| 06.04.01.02 | PROGESTERONE 200mg supps                                      | Progestogen/Progesterone |
| 06.04.01.02 | Progesterone 8% vaginal gel 1.125g applicators                | Progestogen/Progesterone |
| 06.04.01.02 | Medroxyprogesterone acetate contraceptive 50mg/ml Injection   | Progestogen/Progesterone |
| 06.04.01.02 | Progesterone 400mg pessaries                                  | Progestogen/Progesterone |
| 06.04.01.02 | Norethisterone 1mg tablets                                    | Progestogen/Progesterone |
| 06.04.01.02 | Progesterone 200mg suppositories                              | Progestogen/Progesterone |
| 06.04.01.02 | PROGESTERONE 100mg/2mL inj                                    | Progestogen/Progesterone |
| 06.04.01.02 | Allyoestrenol 5mg tablets                                     | Progestogen/Progesterone |
| 06.04.01.02 | Progesterone 400mg suppositories                              | Progestogen/Progesterone |
| 07.03.01.00 | ETHINYL+NORETH 35mcg/1mg tabs                                 | COC                      |
| 07.03.01.00 | ETHINYLOEST+LEVONOR 50/250mcg                                 | COC                      |
| 07.03.01.00 | Ethinylestradiol with levonorgestrel - triphasic with         | COC                      |

|             |                                                                                                                 |     |
|-------------|-----------------------------------------------------------------------------------------------------------------|-----|
|             | placebo 6x30+50mcg; 5x40+75mcg; 10x30+125mcg Tablet                                                             |     |
| 07.03.01.00 | Generic Synphase tablets                                                                                        | COC |
| 07.03.01.00 | ETHINYL+DESOGES 20/150mcg tabs                                                                                  | COC |
| 07.03.01.00 | ETHINY+GEST+PLAC 30/75mcg tabs                                                                                  | COC |
| 07.03.01.00 | ETHINYL+GESTODEN 30/75mcg tabs                                                                                  | COC |
| 07.03.01.00 | ETHINYL+NORETH 35mcg/1mg tabs                                                                                   | COC |
| 07.03.01.00 | Ethinylestradiol with levonorgestrel and placebo 30micrograms + 150micrograms Tablet                            | COC |
| 07.03.01.00 | Ethinylestradiol 30microgram / Drospirenone 3mg tablets                                                         | COC |
| 07.03.01.00 | ETHINYLESTR+DROSPIR 30mcg/3mg                                                                                   | COC |
| 07.03.01.00 | ANOVLAR 21 TAB                                                                                                  | COC |
| 07.03.01.00 | Ethinylestradiol 30microgram / Norethisterone acetate 1.5mg tablets                                             | COC |
| 07.03.01.00 | Ethinylestradiol with lynoestrenol Tablet                                                                       | COC |
| 07.03.01.00 | ETHINYL+LEVONOR 30/150mcg tabs                                                                                  | COC |
| 07.03.01.00 | ETHINYLOESTRADIOL/LEVONORGESTREL 30 MCG TAB                                                                     | COC |
| 07.03.01.00 | ETHINYLESTR+DROSPIR 30mcg/3mg                                                                                   | COC |
| 07.03.01.00 | Ethinylestradiol with norethisterone and placebo 50mcg + 1mg Tablet                                             | COC |
| 07.03.01.00 | ETHINYL+GESTODEN 20/75mcg tabs                                                                                  | COC |
| 07.03.01.00 | Gestodene with ethinylestradiol 75microgramwith30microgram Tablet                                               | COC |
| 07.03.01.00 | Ethinylestradiol with gestodene and placebo 30micrograms + 75micrograms Tablet                                  | COC |
| 07.03.01.00 | OVULEN 50 TAB                                                                                                   | COC |
| 07.03.01.00 | ETHINYL+LEVONOR 30/250mcg tab                                                                                   | COC |
| 07.03.01.00 | Ethinylestradiol 20microgram / Norethisterone acetate 1mg tablets                                               | COC |
| 07.03.01.00 | ETHINYLOEST+LEVONOR 50/250mcg                                                                                   | COC |
| 07.03.01.00 | ETHINYLOEST+LEVONOR 50/250mcg                                                                                   | COC |
| 07.03.01.00 | Mestranol 50microgram / Norethisterone 1mg tablets                                                              | COC |
| 07.03.01.00 | Ethinylestradiol with norethisterone - triphasic and placebo 7 x 35+500mcg; 7 x 35+750mcg; 7 x 35mcg+1mg Tablet | COC |
| 07.03.01.00 | Generic Logynon tablets                                                                                         | COC |
| 07.03.01.00 | Ethinylestradiol with levonorgestrel - triphasic 6x30+50mcg; 5x40+75mcg; 10x30+125mcg Tablet                    | COC |
| 07.03.01.00 | Generic Logynon ED tablets                                                                                      | COC |
| 07.03.01.00 | Generic Logynon tablets                                                                                         | COC |
| 07.03.01.00 | ETHINYL+GESTODEN 30/75mcg tabs                                                                                  | COC |
| 07.03.01.00 | ETHINYL+GESTODEN 30/75mcg tabs                                                                                  | COC |
| 07.03.01.00 | Ethinylestradiol with gestodene - triphasic 6 x 30+50mcg; 5 x 40+70mcg; 10 x 30+100mcg Tablet                   | COC |
| 07.03.01.00 | ETHINYL+NORETH 35/500mcg tabs                                                                                   | COC |

|             |                                                                                                     |     |
|-------------|-----------------------------------------------------------------------------------------------------|-----|
| 07.03.01.00 | Generic Binovum tablets                                                                             | COC |
| 07.03.01.00 | ETHINY+NORETH 30mcg/1.5mg tabs                                                                      | COC |
| 07.03.01.00 | ETHINYL+DESOGES 20/150mcg tabs                                                                      | COC |
| 07.03.01.00 | Ethinylestradiol with norethisterone acetate 50micrograms + 3mg Tablet                              | COC |
| 07.03.01.00 | ETHINYL+NORETH 35/500mcg tabs                                                                       | COC |
| 07.03.01.00 | Ethinylestradiol with levonorgestrel Tablet                                                         | COC |
| 07.03.01.00 | Ethinylestradiol 2.7mg / Etonogestrel 11.7mg vaginal delivery system                                | COC |
| 07.03.01.00 | Ethinylestradiol with norethisterone - triphasic 7x35+500mcg; 9x35mcg+1mg; 5x35+500mcg Tablet       | COC |
| 07.03.01.00 | Generic Tri-Minulet tablets                                                                         | COC |
| 07.03.01.00 | Mestranol with norethisterone Tablet                                                                | COC |
| 07.03.01.00 | Generic Tri-Minulet tablets                                                                         | COC |
| 07.03.01.00 | Ethinylestradiol with levonorgestrel 30micrograms + 50micrograms Tablet                             | COC |
| 07.03.01.00 | MESTRANOL+NORETHIST 50mcg/1mg                                                                       | COC |
| 07.03.01.00 | MINOVLAR TAB                                                                                        | COC |
| 07.03.01.00 | ETHINYL+LEVONOR 30/150mcg tabs                                                                      | COC |
| 07.03.01.00 | ETHINYLOESTRAD.50MCG/LYNOESTRENOL 2.5MG MCG TAB                                                     | COC |
| 07.03.01.00 | Ethinylestradiol 20microgram / Desogestrel 150microgram tablets                                     | COC |
| 07.03.01.00 | ETHINYL+GESTODEN 30/75mcg tabs                                                                      | COC |
| 07.03.01.00 | ETHINYLOESTRADIOL 50MCG/ETHYNODIOL 1MG MCG TAB                                                      | COC |
| 07.03.01.00 | Norgestimate with ethinylestradiol 250micrograms + 35micrograms Tablet                              | COC |
| 07.03.01.00 | Desogestrel with ethinylestradiol 150micrograms with 20micrograms tablets                           | COC |
| 07.03.01.00 | Ethinylestradiol 30microgram / Gestodene 75microgram tablets                                        | COC |
| 07.03.01.00 | ETHINYLOEST+LEVONOR 50/250mcg                                                                       | COC |
| 07.03.01.00 | ETHINYL+LEVONOR 30/150mcg tabs                                                                      | COC |
| 07.03.01.00 | ETHINYLOESTRAD. 50MCG/NORETHISTERONE 3MG MCG TAB                                                    | COC |
| 07.03.01.00 | Ethinylestradiol with norethisterone - triphasic 7 x 35+500mcg; 7 x 35+750mcg; 7 x 35mcg+1mg Tablet | COC |
| 07.03.01.00 | ETHINYL+LEVONOR 30/250mcg tab                                                                       | COC |
| 07.03.01.00 | ETHINYL+NORGES 35/250mcg tabs                                                                       | COC |
| 07.03.01.00 | ETHINYLOES+ETHYNOD 30mcg/2mg                                                                        | COC |
| 07.03.01.00 | Ethinylestradiol with norethisterone - biphasic 7 x 35mcg+500mcg; 14 x 35mcg+1mg Tablet             | COC |
| 07.03.01.00 | MESTRANOL+NORETHIST 50mcg/1mg                                                                       | COC |
| 07.03.01.00 | Ethinylestradiol with norethisterone acetate 50micrograms + 3mg Tablet                              | COC |





|             |                                              |      |
|-------------|----------------------------------------------|------|
| 04.03.03.00 | Fluoxetine 20mg/5ml oral solution            | SSRI |
| 04.03.03.00 | Citalopram 10mg tablets                      | SSRI |
| 04.03.03.00 | FLUOXETINE 20mg capsules                     | SSRI |
| 04.03.03.00 | Fluoxetine 20mg capsules                     | SSRI |
| 04.03.03.00 | FLUOXETINE 20mg capsules                     | SSRI |
| 04.03.03.00 | Citalopram 40mg tablets                      | SSRI |
| 04.03.03.00 | CITALOPRAM 10mg tablets                      | SSRI |
| 04.03.03.00 | FLUOXETINE 20mg/5mL oral liq                 | SSRI |
| 04.03.03.00 | Fluoxetine 20mg capsules                     | SSRI |
| 04.03.03.00 | Paroxetine 30mg tablets                      | SSRI |
| 04.03.03.00 | FLUOXETINE 20mg/5mL oral liq                 | SSRI |
| 04.03.03.00 | PAROXETINE 30mg tablets                      | SSRI |
| 04.03.03.00 | Citalopram 20mg tablets                      | SSRI |
| 04.03.03.00 | Paroxetine 30mg tablets                      | SSRI |
| 04.03.03.00 | Citalopram 40mg tablets                      | SSRI |
| 04.03.03.00 | Fluoxetine 20mg/5ml oral solution sugar free | SSRI |
| 04.03.03.00 | Citalopram 10mg tablets                      | SSRI |
| 04.03.03.00 | Citalopram 10mg tablets                      | SSRI |
| 04.03.03.00 | Escitalopram 10mg tablets                    | SSRI |
| 04.03.03.00 | CITALOPRAM 40mg/mL oral drops                | SSRI |
| 04.03.03.00 | ESCITALOPRAM 20mg tablets                    | SSRI |
| 04.03.03.00 | Citalopram 10mg tablets                      | SSRI |
| 04.03.03.00 | Paroxetine 20mg tablets                      | SSRI |
| 04.03.03.00 | Fluvoxamine 50mg tablets                     | SSRI |
| 04.03.03.00 | Sertraline 100mg tablets                     | SSRI |
| 04.03.03.00 | Escitalopram 10mg/ml oral drops sugar free   | SSRI |
| 04.03.03.00 | Fluoxetine 20mg capsules                     | SSRI |
| 04.03.03.00 | FLUOXETINE 60mg capsules                     | SSRI |
| 04.03.03.00 | Citalopram 20mg tablets                      | SSRI |
| 04.03.03.00 | Citalopram 10mg tablets                      | SSRI |
| 04.03.03.00 | Paroxetine 10mg tablets                      | SSRI |
| 04.03.03.00 | Citalopram 40mg tablets                      | SSRI |
| 04.03.03.00 | Citalopram 40mg/ml oral drops sugar free     | SSRI |
| 04.03.03.00 | Fluoxetine 60mg capsules                     | SSRI |
| 04.03.03.00 | Fluoxetine 20mg/5ml oral solution            | SSRI |
| 04.03.03.00 | SERTRALINE 100mg tablets                     | SSRI |
| 04.03.03.00 | Fluvoxamine 100mg tablets                    | SSRI |
| 04.03.03.00 | Fluoxetine 20mg capsules                     | SSRI |
| 04.03.03.00 | ESCITALOPRAM 10mg tablets                    | SSRI |
| 04.03.03.00 | Fluoxetine 20mg capsules                     | SSRI |
| 04.03.03.00 | Fluoxetine 20mg capsules                     | SSRI |
| 04.03.03.00 | ESCITALOPRAM 5mg tablets                     | SSRI |
| 04.03.03.00 | Sertraline 50mg tablets                      | SSRI |
| 04.03.03.00 | Citalopram 20mg tablets                      | SSRI |

|             |                                                |      |
|-------------|------------------------------------------------|------|
| 04.03.03.00 | Citalopram 40mg tablets                        | SSRI |
| 04.03.03.00 | CITALOPRAM 10mg tablets                        | SSRI |
| 04.03.03.00 | Paroxetine 20mg tablets                        | SSRI |
| 04.03.03.00 | Paroxetine 10mg/5ml oral suspension sugar free | SSRI |
| 04.03.03.00 | FLUOXETINE 20mg capsules                       | SSRI |
| 04.03.03.00 | Citalopram 20mg tablets                        | SSRI |
| 04.03.03.00 | Fluoxetine 20mg capsules                       | SSRI |
| 04.03.03.00 | Fluoxetine 20mg capsules                       | SSRI |
| 04.03.03.00 | Fluvoxamine 100mg tablets                      | SSRI |
| 04.03.03.00 | Citalopram 20mg tablets                        | SSRI |
| 04.03.03.00 | FLUOXETINE 20mg capsules                       | SSRI |
| 04.03.03.00 | Paroxetine 20mg tablets                        | SSRI |
| 04.03.03.00 | Citalopram 10mg tablets                        | SSRI |
| 04.03.03.00 | Fluoxetine 20mg/5ml oral solution              | SSRI |
| 04.03.03.00 | Paroxetine 20mg tablets                        | SSRI |
| 04.03.03.00 | Citalopram 20mg tablets                        | SSRI |
| 04.03.03.00 | ESCITALOPRAM 20mg/mL oral dps                  | SSRI |
| 04.03.03.00 | Citalopram 40mg tablets                        | SSRI |
| 04.03.03.00 | Escitalopram 5mg tablets                       | SSRI |
| 04.03.03.00 | FLUVOXAMINE MALEATE 50mg tabs                  | SSRI |
| 04.03.03.00 | ESCITALOPRAM 10mg/mL oral dps                  | SSRI |
| 04.03.03.00 | Sertraline 100mg tablets                       | SSRI |
| 04.03.03.00 | Citalopram 10mg tablets                        | SSRI |
| 04.03.03.00 | Citalopram 10mg tablets                        | SSRI |
| 04.03.03.00 | Fluoxetine 60mg capsules                       | SSRI |
| 04.03.03.00 | Citalopram 20mg tablets                        | SSRI |
| 04.03.03.00 | Citalopram 20mg tablets                        | SSRI |
| 04.03.03.00 | Fluoxetine 20mg/5ml oral solution              | SSRI |
| 04.03.03.00 | Citalopram 40mg tablets                        | SSRI |
| 04.03.03.00 | Paroxetine 20mg tablets                        | SSRI |
| 04.03.03.00 | PAROXETINE 20mg tablets                        | SSRI |
| 04.03.03.00 | CITALOPRAM 20mg tablets                        | SSRI |
| 04.03.03.00 | CITALOPRAM 40mg tablets                        | SSRI |
| 04.03.03.00 | Fluoxetine 20mg capsules                       | SSRI |
| 04.03.03.00 | Citalopram 10mg tablets                        | SSRI |
| 04.03.03.00 | Citalopram 20mg tablets                        | SSRI |
| 04.03.03.00 | Fluoxetine 20mg capsules                       | SSRI |
| 04.03.03.00 | Fluvoxamine 100mg tablets                      | SSRI |
| 04.03.03.00 | FLUVOXAMINE MALEATE 100mg tabs                 | SSRI |
| 04.03.03.00 | Paroxetine 20mg tablets                        | SSRI |
| 04.03.03.00 | Paroxetine 30mg tablets                        | SSRI |
| 04.03.03.00 | Citalopram 40mg tablets                        | SSRI |
| 04.03.03.00 | Escitalopram 20mg/ml oral drops sugar free     | SSRI |
| 04.03.03.00 | Fluoxetine 20mg capsules                       | SSRI |

|             |                                              |      |
|-------------|----------------------------------------------|------|
| 04.03.03.00 | Citalopram 40mg tablets                      | SSRI |
| 04.03.03.00 | Escitalopram 20mg tablets                    | SSRI |
| 04.03.03.00 | Sertraline 50mg/5ml oral suspension          | SSRI |
| 04.03.03.00 | Citalopram 40mg tablets                      | SSRI |
| 04.03.03.00 | Fluoxetine 20mg capsules                     | SSRI |
| 04.03.03.00 | Citalopram 10mg tablets                      | SSRI |
| 04.03.03.00 | Citalopram 40mg tablets                      | SSRI |
| 04.03.03.00 | Sertraline 100mg tablets                     | SSRI |
| 04.03.03.00 | PAROXETINE 10mg tablets                      | SSRI |
| 04.03.03.00 | Paroxetine 30mg tablets                      | SSRI |
| 04.03.03.00 | Fluoxetine 20mg capsules                     | SSRI |
| 04.03.03.00 | Fluoxetine 20mg capsules                     | SSRI |
| 04.03.03.00 | Sertraline 100mg tablets                     | SSRI |
| 04.03.03.00 | PAROXETINE 10mg/5mL s/f liq                  | SSRI |
| 04.03.03.00 | Citalopram 20mg tablets                      | SSRI |
| 04.03.03.00 | Fluoxetine 20mg/5ml oral solution sugar free | SSRI |
| 04.03.03.00 | SERTRALINE 50mg tablets                      | SSRI |
